# Supplementary material for: Metastasis suppressor 1 (MTSS1) expression is associated with reduced in-vivo metastasis and enhanced patient survival in lung adenocarcinoma
Source: Springer Nature journal article supplement (doi:10.1007/s10585-017-9869-3), 2017-12-07
Supplement: MOESM2 [file 15287056]

**Supplemental Figure 1.** Representative image following flow cytometric sorting of H1299 with high expression of MTSS1 protein. The MTSS1 plasmid transfected into the H1299 cells is tagged with mCherry red allowing flourometric quantification.

**Supplemental Figure 2**. Quantification of MTSS1 protein expression in Figure 3a following transfection of siRNA to MTSS1 in A549 lung adenocarcinoma cells. Transfection of MTSS1 siRNA in lung adenocarcinoma cells resulted in a 98.5% decrease in MTSS1 protein expression.

**Supplemental Figure 3**. Platypus migration assay conducted without serum in H1299-GFP and H1299-GFP-MTSS1 lung adenocarcinoma cells. The decrease in cell migration associated with stable overexpression of MTSS1 is maintained in the absence of serum.
